# Supplementary material for: The crumpling transition of active tethered membranes
Source: Royal Society of Chemistry journal article supplement (doi:10.1039/d3sm00403a), 2023-01-01
Supplement: d3sm00403a2.pdf [file d3sm00403a2.pdf]

## Supplemental Material: The crumpling transition of active tethered membranes

M. C. Gandikota and A. Cacciuto<sup>1</sup>

<sup>1</sup>*Department of Chemistry, Columbia University  
3000 Broadway, New York, NY 10027*

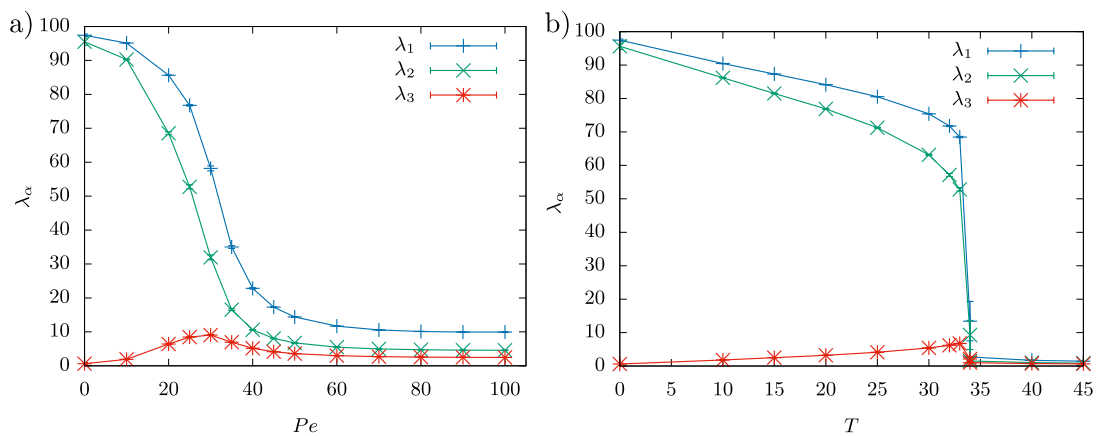

FIG. 1: (a) Eigenvalues of shape-tensor,  $\lambda_\alpha$ , for ideal membranes as a function of Péclet number  $Pe$ . (b) Eigenvalues of shape-tensor,  $\lambda_\alpha$ , for ideal membranes as a function of temperature  $T$ . The system size of the membrane is  $N = 1142$  and the eigenvalues are sorted by size with  $\lambda_1 > \lambda_2 > \lambda_3$ . The bending constant  $\kappa = 10$ .
